# Supplementary material for: Effects of the deep-sea osmolyte TMAO on the temperature and pressure dependent structure and phase behavior of lipid membranes
Source: Royal Society of Chemistry journal article supplement (doi:10.1039/c9cp03812d), 2019-01-01
Supplement: c9cp03812d1.pdf [file c9cp03812d1.pdf]

## Supplementary Information

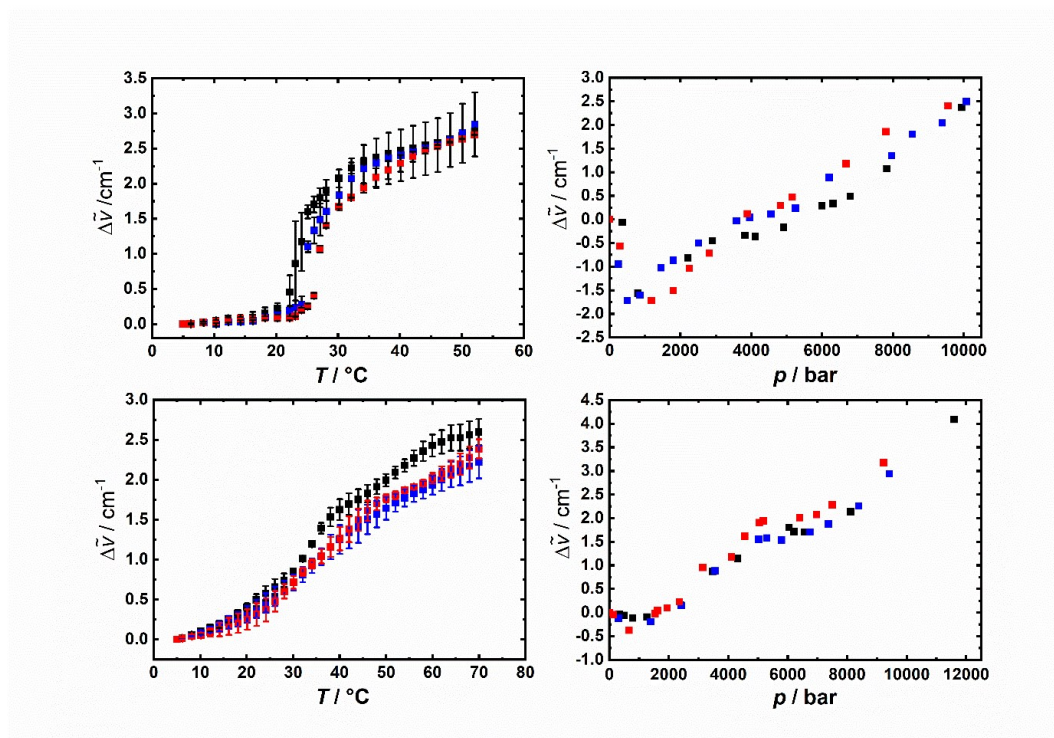

**Fig. S1:** The results of the temperature (left) and pressure (right) dependent FT-IR spectroscopy data of the symmetric  $\text{CH}_2$  stretching vibration at  $\sim 2850 \text{ cm}^{-1}$  of DMPC (top) and DOPC:DPPC:Chol 1:2:1 (bottom) (black: 0 M, blue: 1 M and red: 3 M TMAO). The wavenumbers are given as difference with respect to the data at  $5^\circ\text{C}$  and 1 bar, respectively. Phase transitions are indicated as changes in the slope of the  $\text{CH}_2$  stretching vibration.

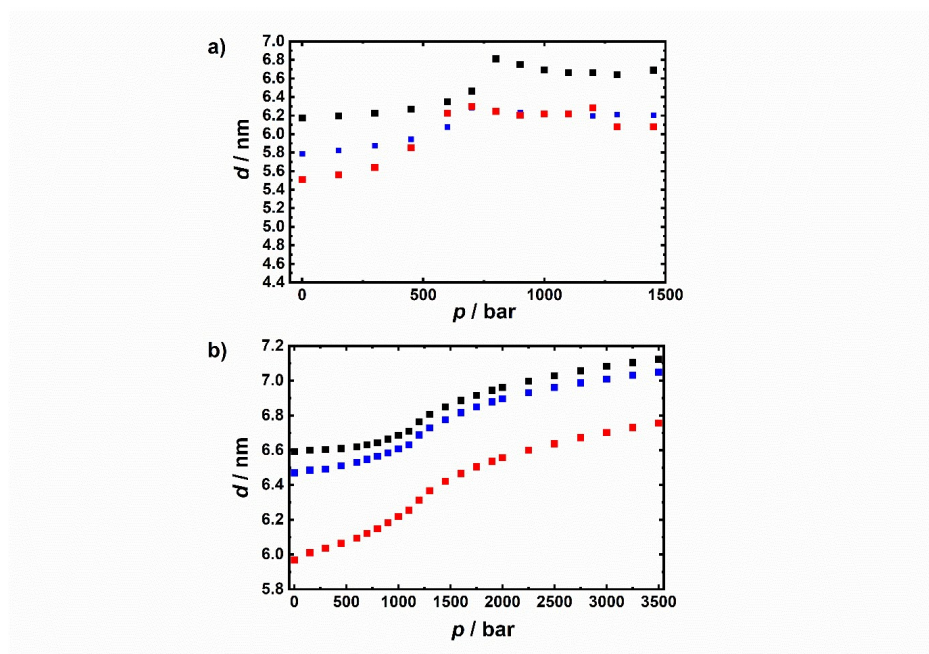

**Fig. S2:** The effect of TMAO on the pressure dependence of the lamellar repeat distance,  $d$ , of (a) DMPC and (b) DOPC:DPPC:Chol 1:2:1 (black: 0 M, blue: 1 M and red: 3 M TMAO).

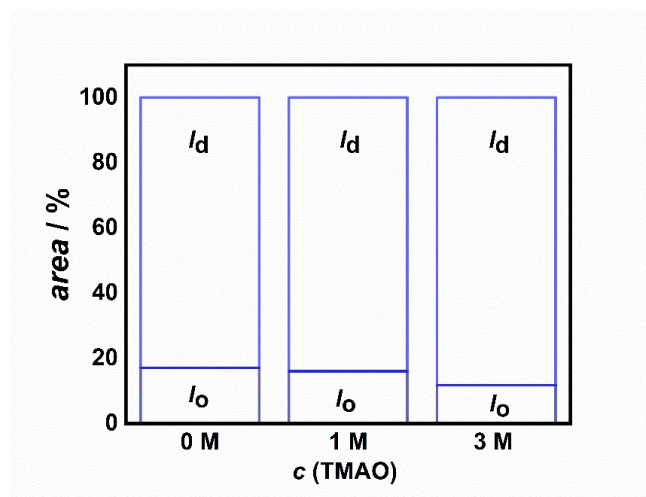

**Fig. S3:** Domain area distribution of liquid-ordered ( $l_o$ ) and liquid-disordered ( $l_d$ ) phases of the lipid system DOPC:DPPC:Chol 1:2:1 for different TMAO concentrations.

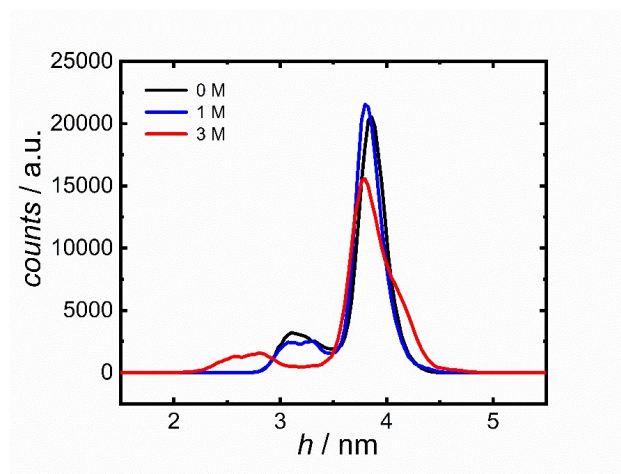

**Fig. S4:** Membrane height distribution (measured relative to the mica surface) of the lipid system DOPC:DPPC:Chol 1:2:1 for different TMAO concentrations. The difference between the maxima of the height distribution reflects the height difference between domains.
